# Supplementary material
Source: PubMed Central journal article supplement (PMC3197883)
Supplement: NIHMS318665-supplement-1.pdf [file NIHMS318665-supplement-1.pdf]

# **The carboxypeptidase angiotensin converting enzyme (ACE) shapes the MHC class I peptide repertoire**

Xiao Z. Shen<sup>1</sup>, Sandrine Billet<sup>1</sup>, Chentao Lin<sup>1,3</sup>, Derick Okwan-Duodu<sup>1</sup>, Xu Chen<sup>1,3</sup>,  
Kenneth E. Bernstein<sup>1,4</sup>

<sup>1</sup>Department of Biomedical Sciences, <sup>4</sup>Department of Pathology and Laboratory Medicine, Cedars-Sinai Medical Center, Los Angeles, CA, 90048, USA

<sup>3</sup>Current address: Department of Immunology, Institute of Biotechnology, Fujian Academy of Agricultural Sciences, Fuzhou, Fujian, 350003, China

## Supplementary Fig. 1

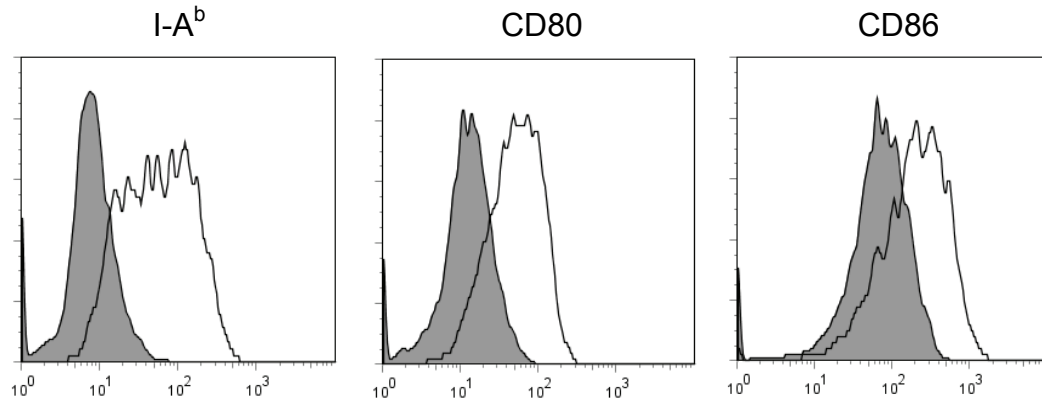

**Supplementary Fig. 1** Expression of maturation associated surface markers in macrophages. Surface MHC class II (I-A<sup>b</sup>), CD80 and CD86 on TPM (solid line) and M-CSF-induced MΦ (shaded) were evaluated by flow cytometry. These histograms are representative of four independent experiments.

## Supplementary Fig. 2

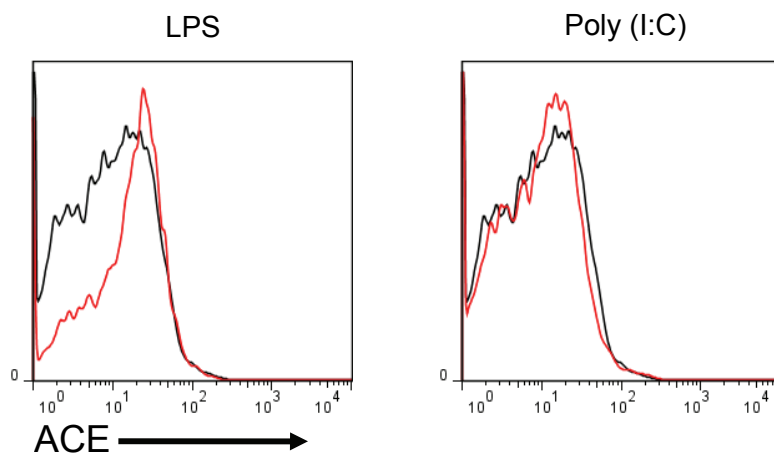

**Supplementary Fig. 2** ACE expression in DCs after TLR ligand stimulation. ACE expression in bone marrow-derived DCs with (red) or without (black) LPS or Poly (I:C) stimulation for 24 h. Data are representative of 3 independent experiments.

### Supplementary Fig. 3

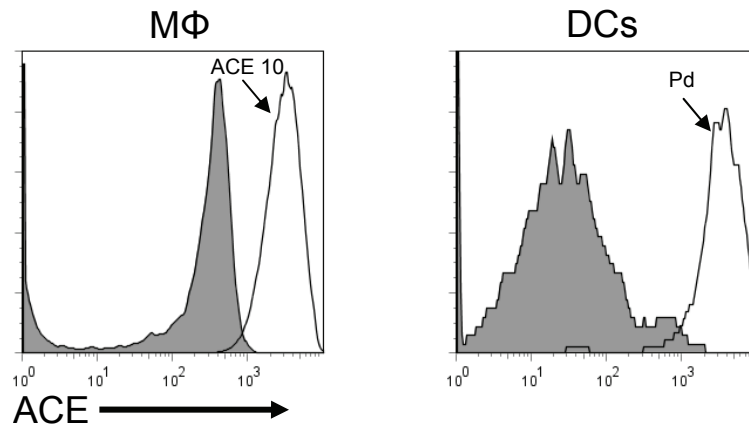

**Supplementary Fig. 3** ACE expression by macrophages and DCs. Resident peritoneal F4/80<sup>+</sup> macrophages from ACE 10 mice (left) and splenic CD11c<sup>+</sup> DCs from Pd mice (right) were compared with equivalent cells from *Ace*<sup>+/+</sup> littermates (shaded). The histograms are typical of those obtained from at least 3 pairs of mice from each strain.

## Supplementary Fig. 4

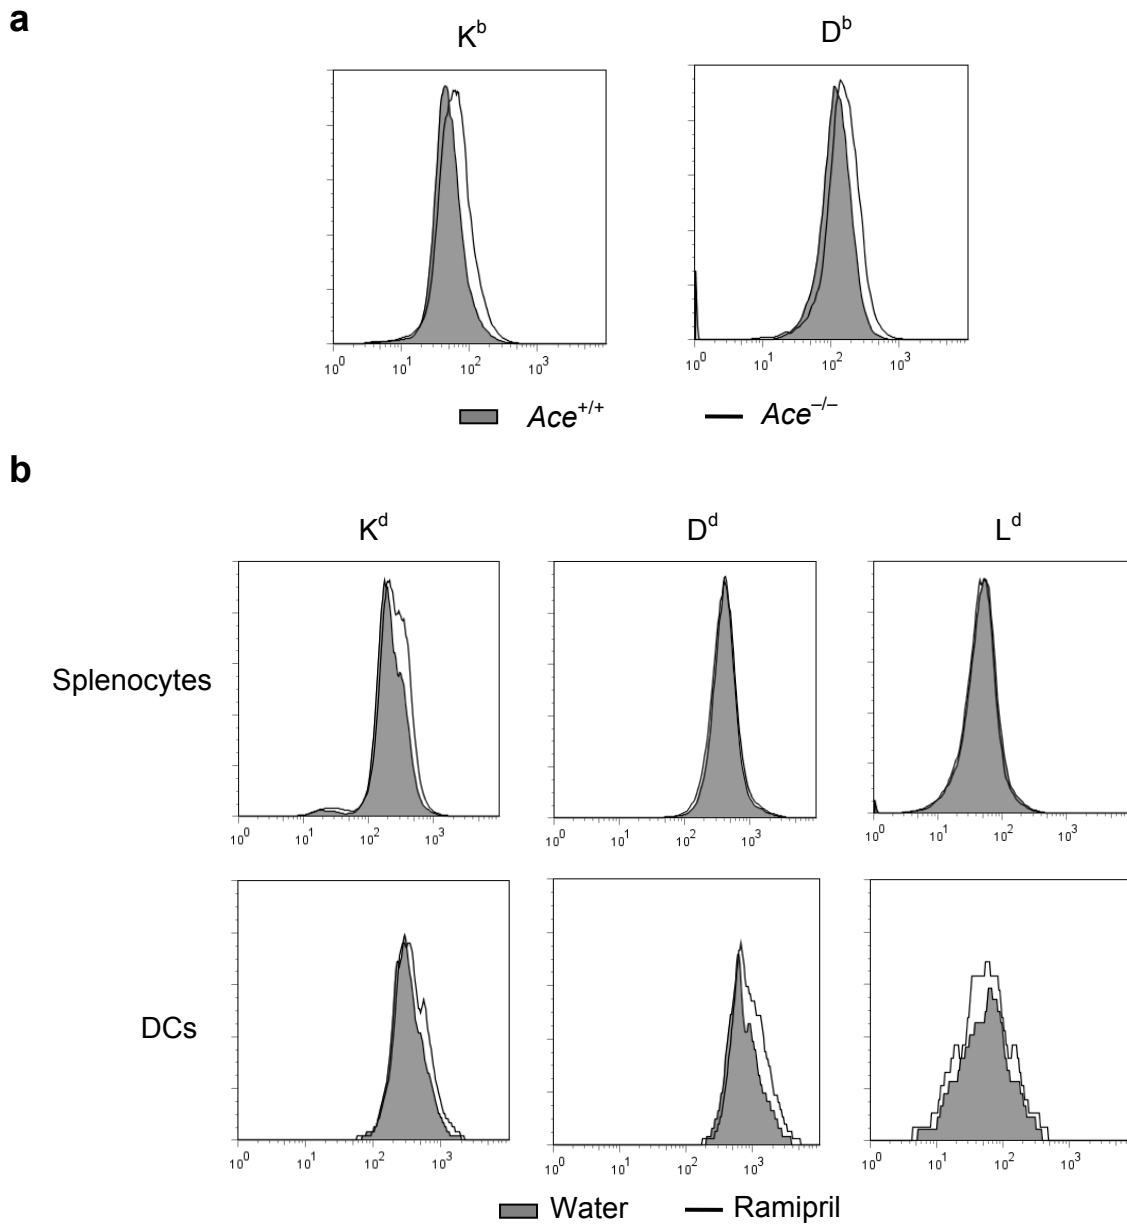

**Supplementary Fig. 4** Surface MHC class I levels on the splenocytes. **(a)**  $K^b$  and  $D^b$  expressed by  $Ace^{+/+}$  and  $Ace^{-/-}$  total splenocytes. Data are representative of 5 pairs of mice. **(b)**  $K^d$ ,  $D^d$  and  $L^d$  on the total splenocytes and splenic DCs of BALB/c mice treated with the ACE inhibitor ramipril or with water for 6 d. Data are representative of 6 pairs of mice.

## Supplementary Fig. 5

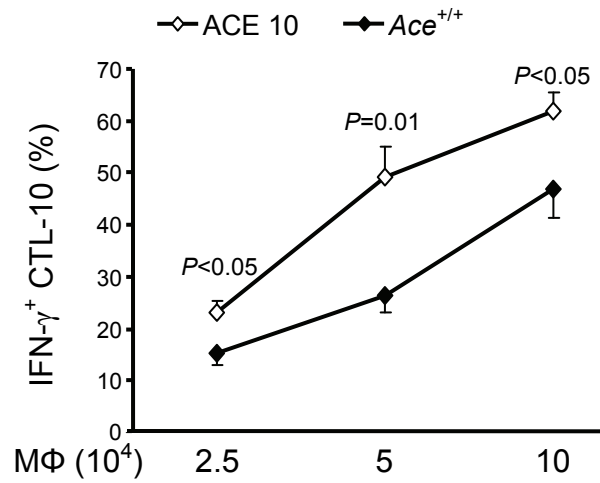

**Supplementary Fig. 5** D<sup>b</sup>-Uty presentation by ACE over-expressing cells. The indicated number of macrophages from male *Ace*<sup>+/+</sup> or ACE 10 mice were incubated with  $1 \times 10^5$  Uty-specific CTLs, clone CTL-10. The percentage of IFN- $\gamma$ <sup>+</sup> CTLs was determined by flow cytometry. n = 6.

## Supplementary Fig. 6

**a**

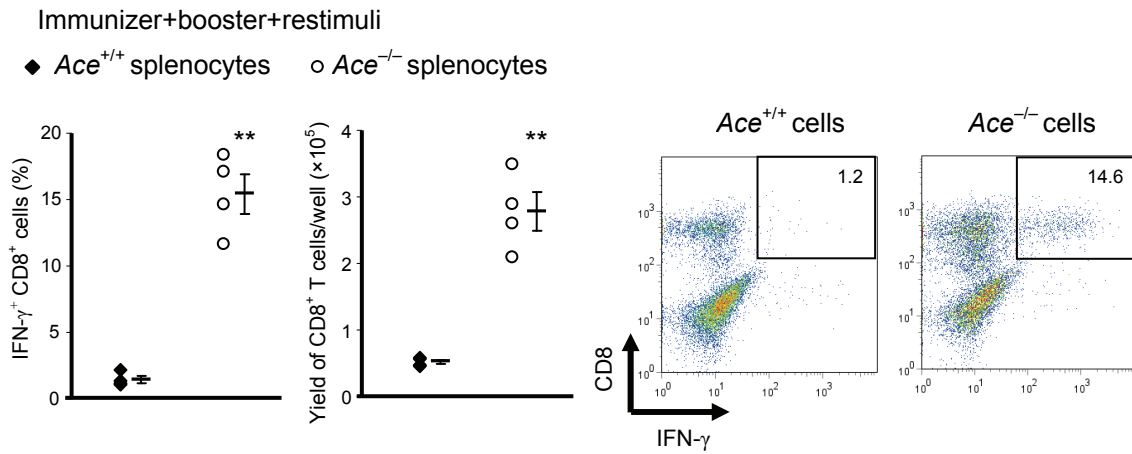

**b**

Immunizer+booster: ◆ ♂ *Ace*<sup>+/+</sup> M $\Phi$     ○ ♂ *Ace*<sup>-/-</sup> M $\Phi$

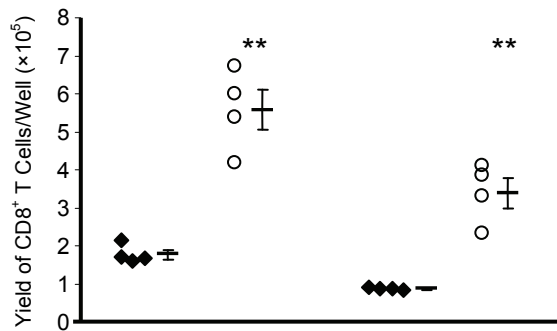

**c**

Immunizer+booster

◆ *Ace*<sup>+/+</sup> M $\Phi$     ○ *Ace*<sup>-/-</sup> M $\Phi$

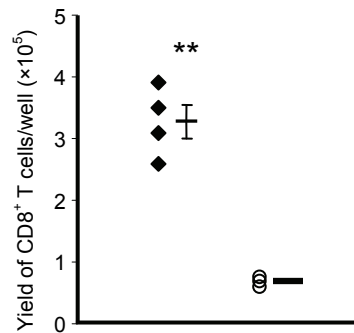

**Supplementary Fig. 6** The effects of ACE on CD8<sup>+</sup> T cell repertoire. **(a)** *Ace*<sup>+/+</sup> mice were immunized, boosted and restimulated with splenocytes from *Ace*<sup>+/+</sup> or *Ace*<sup>-/-</sup> mice of the same gender. The percentage of IFN- $\gamma$  secreting CD8<sup>+</sup> T cells and the yields of CD8<sup>+</sup> T cells responding to the indicated cells are shown. The right portion of the figure shows representative examples of IFN- $\gamma$  expression by the CD8<sup>+</sup> T cells. **(b)** Supplemental to Fig. 4b. The yields of CD8<sup>+</sup> T cells responding to the indicated cells are shown. **(c)** Supplemental to Fig. 4c. The yields of CD8<sup>+</sup> T cells responding to the indicated cells are shown. \*\* $P < 0.01$ .

## Supplementary Fig. 7

**a**

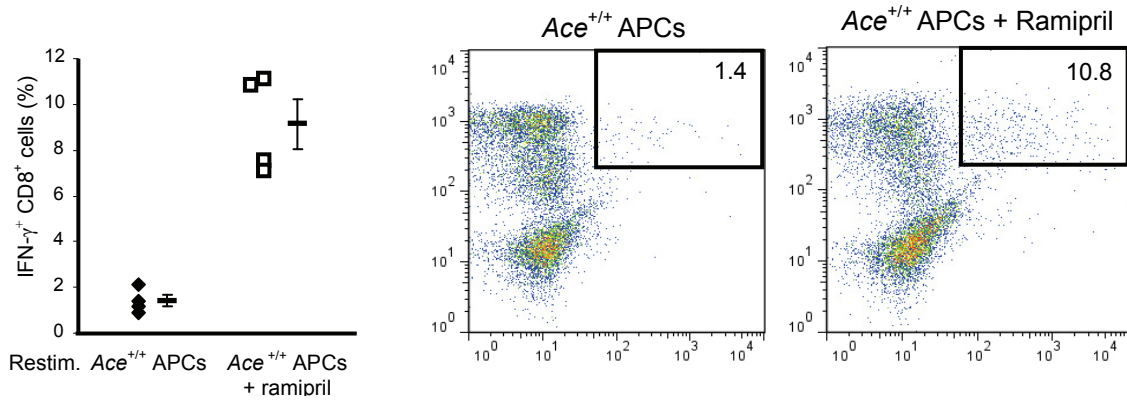

**b**

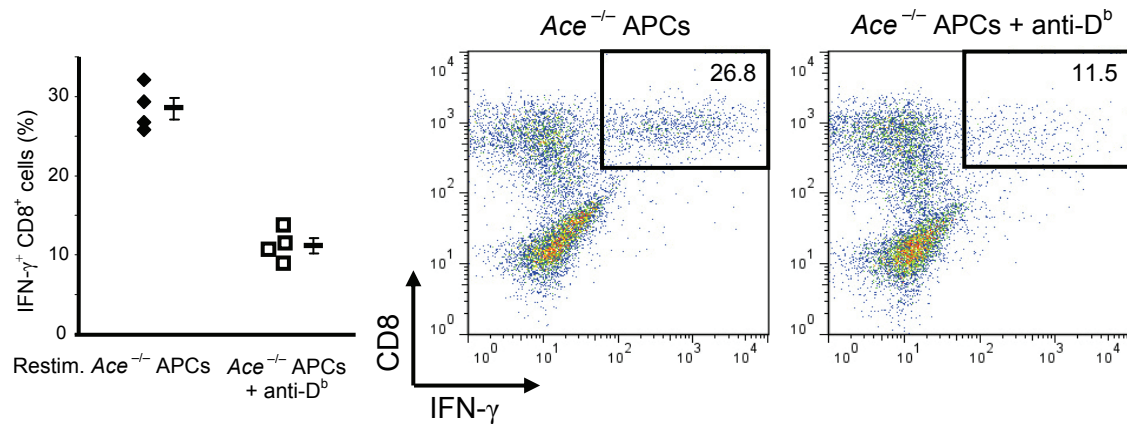

**Supplementary Fig. 7** ACE inhibition changes MHC class I peptide pool. *Ace* $^{+/+}$  mice were immunized and boosted with M $\Phi$  from *Ace* $^{-/-}$  mice of the same gender. The splenocytes from the immunized mice were restimulated with either *Ace* $^{+/+}$  cells or the cells derived from ramipril-treated *Ace* $^{+/+}$  mice (**panel a**). In other experiments, cells were restimulated with *Ace* $^{-/-}$  cells or *Ace* $^{-/-}$  cells pretreated with anti-D $^b$  antibody (**panel b**). The percentage of IFN- $\gamma$  secreting CD8 $^+$  T cells was measured (left). The right portion of the figure shows representative histograms of the CD8 $^+$  T cell response. Data are pooled from 2 independent experiments.

## Supplementary Fig. 8

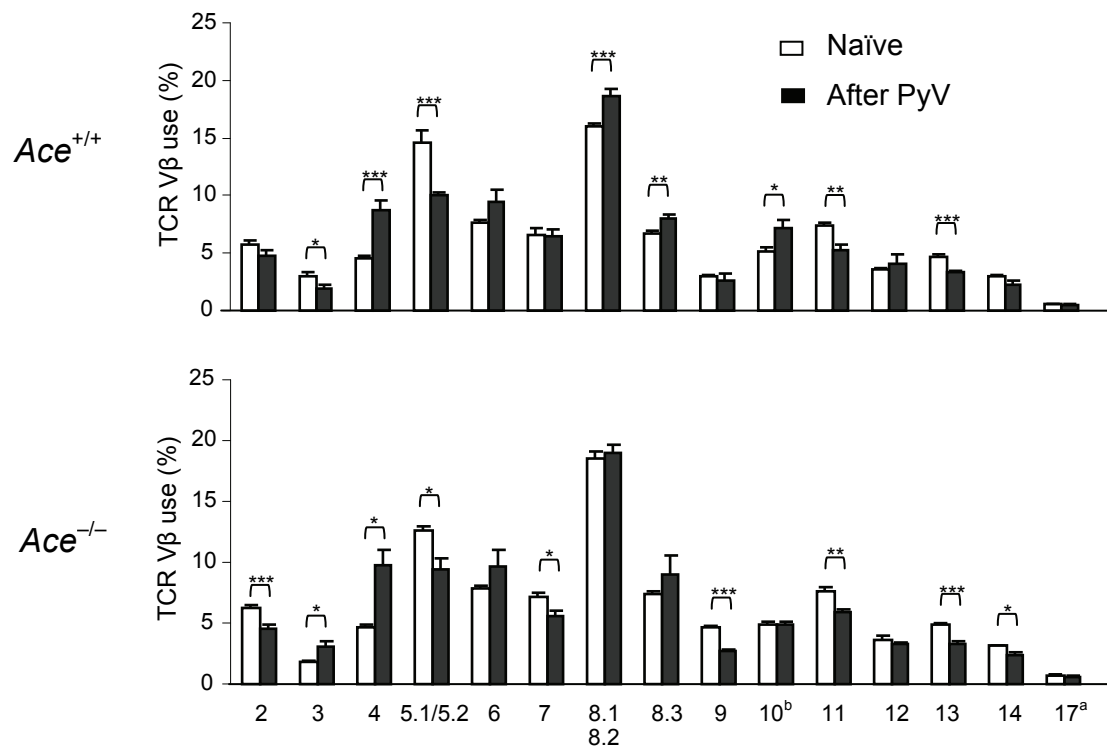

**Supplementary Fig. 8** TCR repertoire change after polyomavirus infection. TCR Vβ usage was screened in *Ace*<sup>+/+</sup> and *Ace*<sup>-/-</sup> mice before and 8 d after polyomavirus (PyV) infection. Data, which are shown as mean + s.e.m., are pooled from 6 pairs of *Ace*<sup>+/+</sup> mice and 4 pairs of *Ace*<sup>-/-</sup> mice. \**P* < 0.05; \*\**P* < 0.01; \*\*\**P* < 0.005.



## Supplementary Fig. 9

**a**

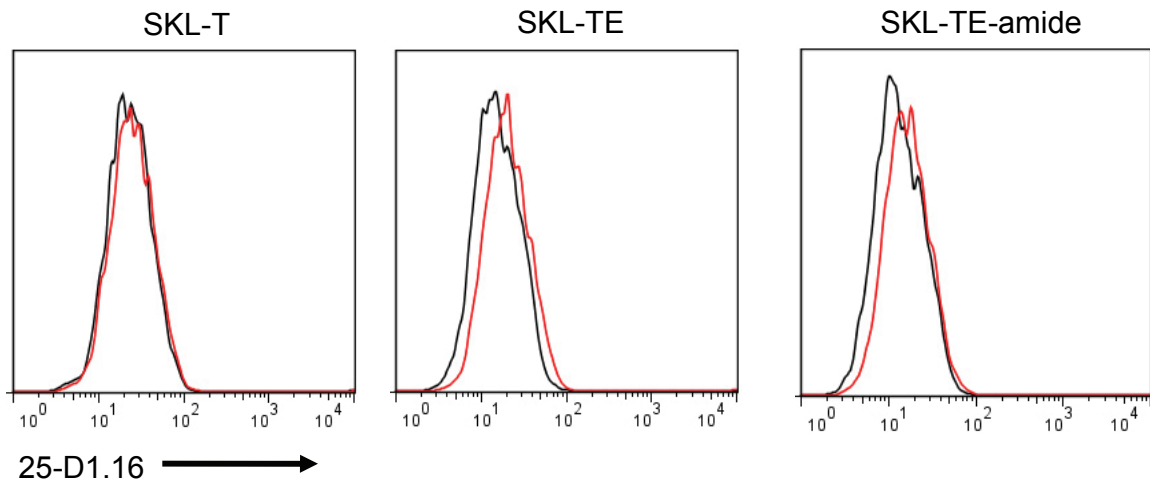

**b**

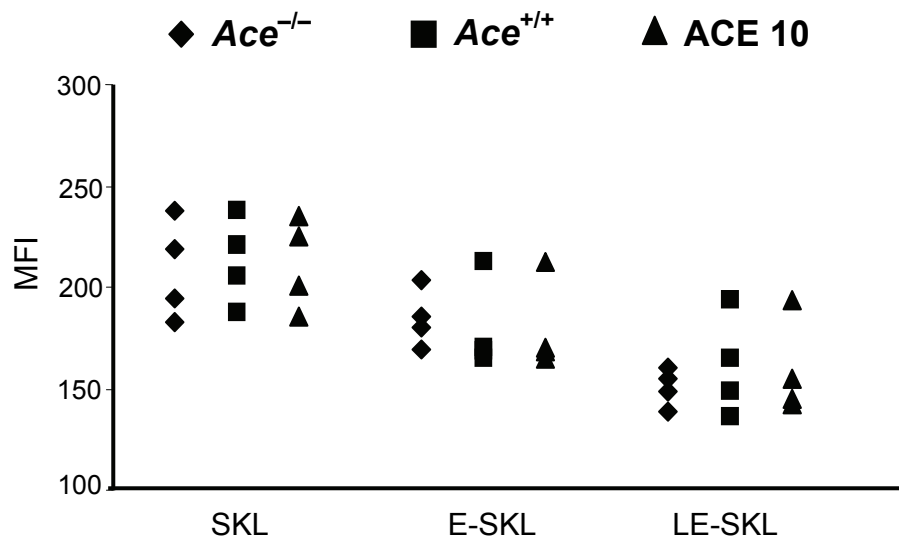

**Supplementary Fig. 9** *In vivo* analysis of ACE catalytic activity. **(a)** Histograms of 25-D1.16 staining after *Ace*<sup>+/+</sup> MΦ (black) and ACE 10 MΦ (red) were pulsed with the indicated peptides. Data are representative of 3 independent experiments. **(b)** Macrophages from *Ace*<sup>-/-</sup>, *Ace*<sup>+/+</sup> and ACE 10 mice were nucleofected with a GFP expressing construct and the indicated minigenes expressing SKL or SKL with 1- or 2-mer extension at the N-terminus. 25-D1.16 staining of GFP<sup>+</sup> cells was evaluated 24 h later.

## Supplemental Figure 10

**a**

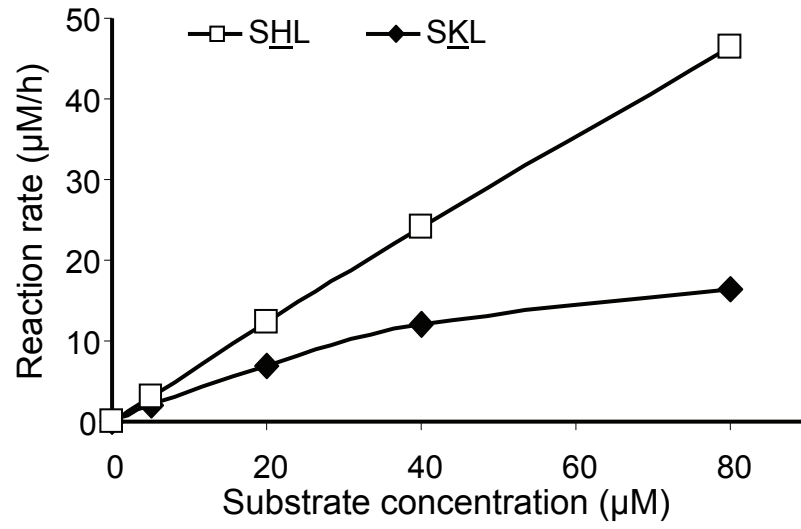

**b**

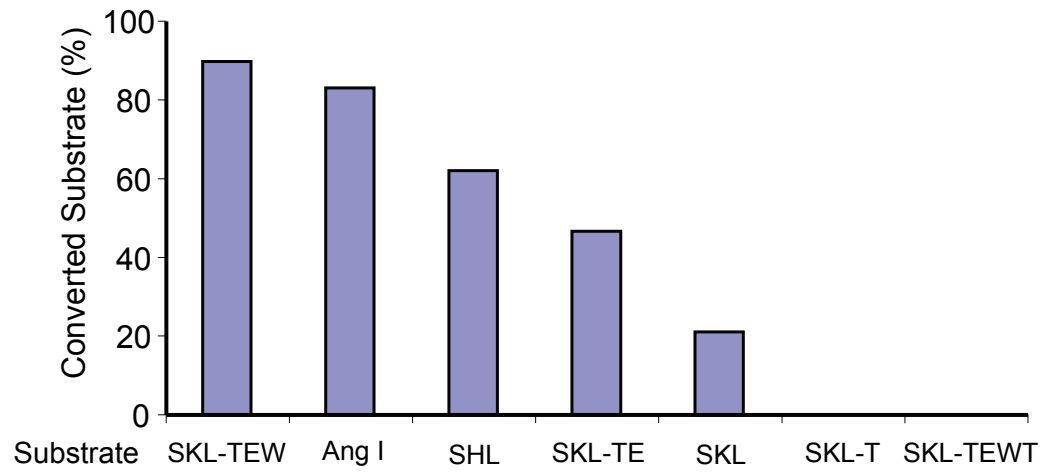

C

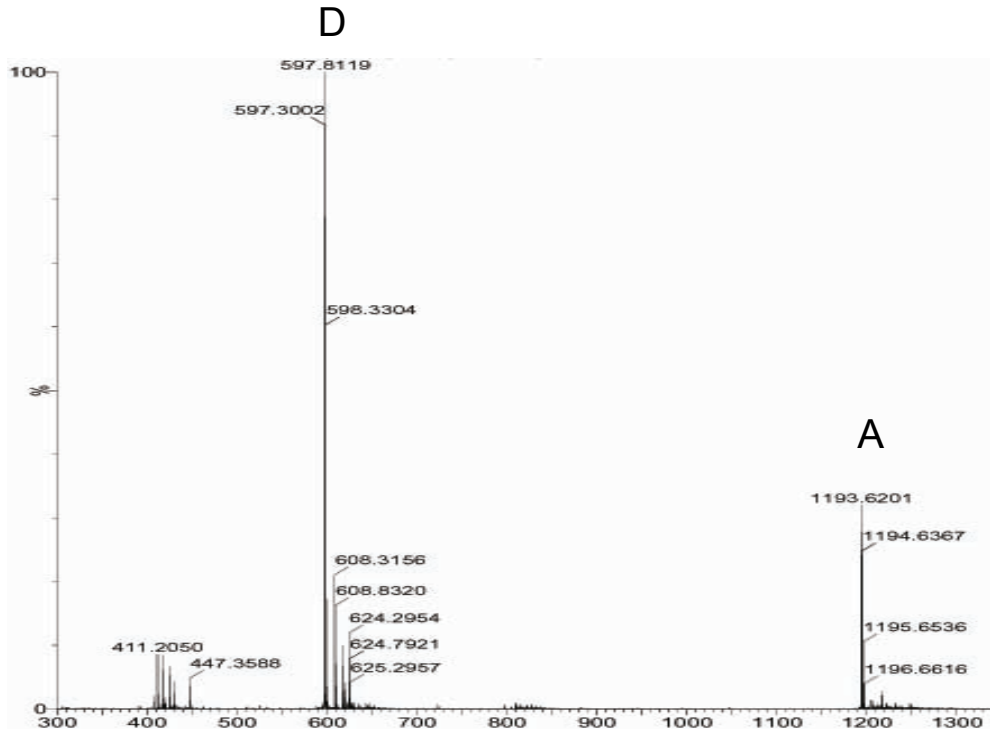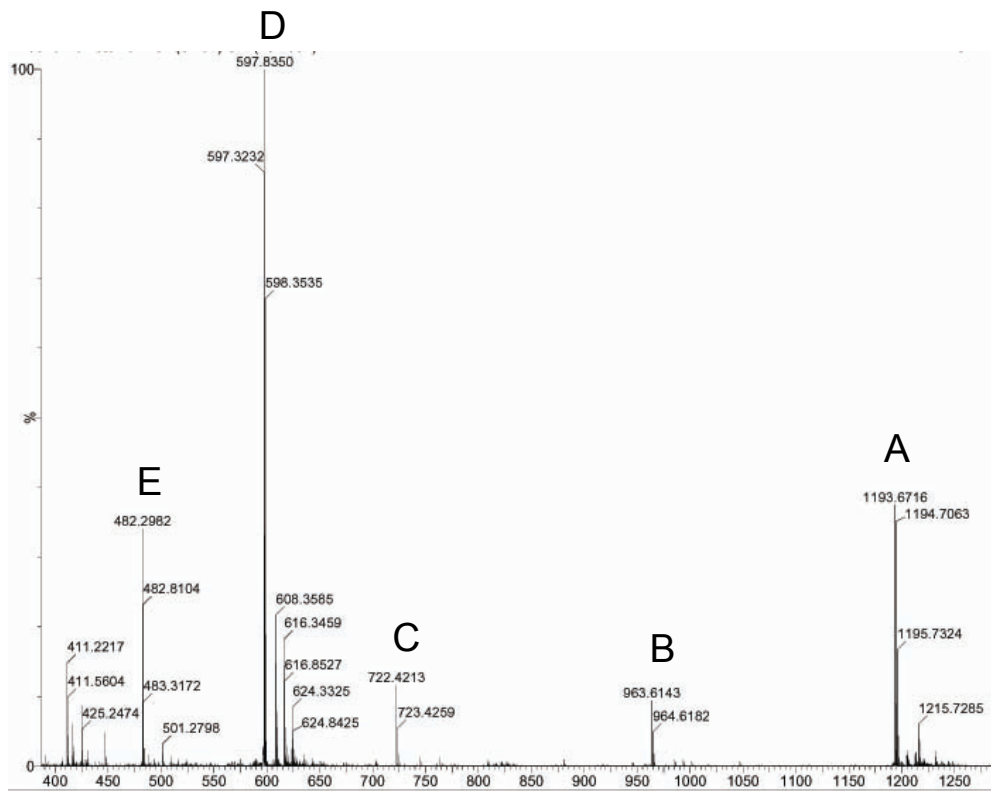

**Supplementary Fig 10.** *In vitro* biochemical analysis of ACE catalytic activity. **(a)** The indicated concentration of SKL or SHL was incubated with ACE for 1 h at 37°C. The reaction was stopped by EDTA and 0°C. The N-terminal 6-mer, SIINFE, was quantitated by LC-MS, and the representative Michaelis–Menten kinetics were drawn. **(b)** 20 μM of the indicated peptides, including angiotensin I (Ang I), were incubated with ACE for 1 h, respectively, and compared to the reaction without ACE. The percentage of hydrolyzed substrate was then calculated. **(c)** Upper: the spectrum of SKL-TE without ACE degradation. Lower: the spectrum of SKL-TE after 0.5 h ACE degradation; (A) SKL-TE +1 *m/z*; (B) SKL +1 *m/z*; (C) SIINFE +1 *m/z*; (D) SKL-TE +2 *m/z*; (E) SKL +2 *m/z*.

## Supplementary Fig. 11

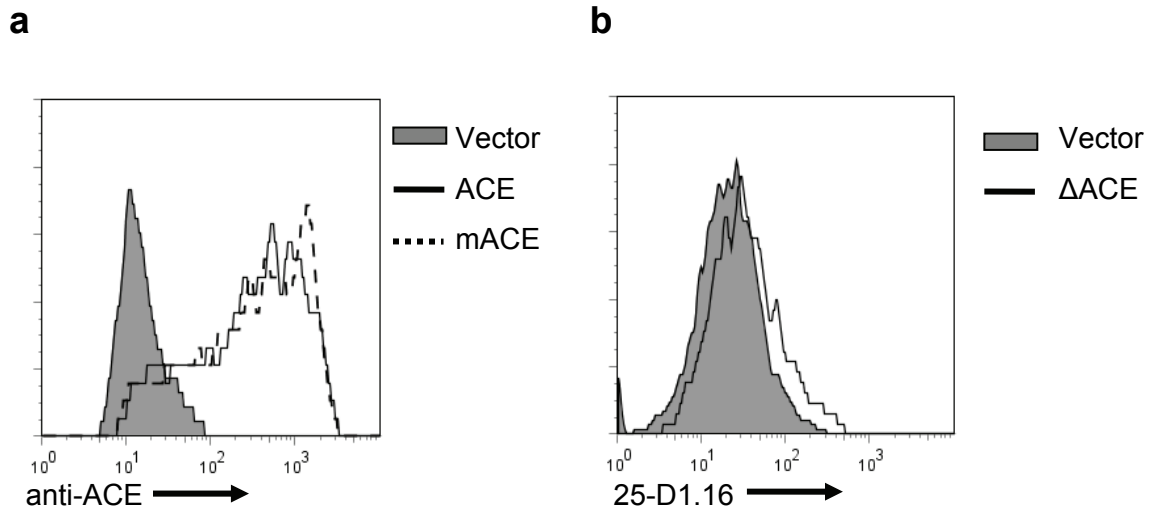

**Supplementary Fig. 11** The mutated ACE constructs. **(a)** L.K<sup>b</sup> cells were transfected with an empty vector or the construct expressing either wild-type ACE or catalytic domain mutated ACE (mACE). A polyclonal ACE antibody was used to detect the expression of the constructs. **(b)** An SKL-TE minigene was transfected to L.K<sup>b</sup> cells which were also co-transfected with either an empty vector or a construct expressing N-terminal signal truncated ACE ( $\Delta$ ACE). SKL presentation was evaluated with the 25-D1.16 antibody. Representative histograms from at least 3 independent experiments are shown for a and b.

**Supplementary Table 1** Peptides used in ACE catalytic assays

| Symbol              | Sequence         |
|---------------------|------------------|
| <b>SKL</b>          | SIINFEKL         |
| <b>SHL</b>          | SIINFEHL         |
| <b>SKL-T</b>        | SIINFEKLT        |
| <b>SKL-TE</b>       | SIINFEKLTE       |
| <b>SKL-TE-amide</b> | SIINFEKLTE-amide |
| <b>E-SKL</b>        | ESIINFEKL        |
| <b>LE-SKL</b>       | LESIINFEKL       |
